# Supplementary material for: Conversion of fluoroform to CHCl3 and AlClxF3−xvia its mechanochemical reaction with AlCl3
Source: Royal Society of Chemistry journal article supplement (doi:10.1039/d4gc02101k), 2024-01-01
Supplement: d4gc02101k1.pdf [file d4gc02101k1.pdf]

## Supporting Information

### Conversion of Fluoroform to $\text{CHCl}_3$ and $\text{AlCl}_x\text{F}_{3-x}$ via its mechanochemical reaction with $\text{AlCl}_3$

Yiwei Tang<sup>a,b</sup>, Hui Shao<sup>a,b</sup>, Yingzhou Lu<sup>\*,a</sup>, Hong Meng<sup>d</sup>, Hongwei Fan<sup>a</sup>, Chunxi  
Li<sup>\*,a,b,c</sup>

<sup>a</sup>College of Chemical Engineering, Beijing University of Chemical Technology,  
Beijing 100029, P.R. China

<sup>b</sup>State Key Laboratory of Chemical Resource Engineering, Beijing University of  
Chemical Technology, Beijing 100029, P.R. China

<sup>c</sup>Beijing Key Laboratory of Energy Environmental Catalysis, Beijing University of  
Chemical Technology, Beijing 100029, P.R. China

<sup>d</sup>State Key Laboratory of Chemistry and Utilization of Carbon Based Energy  
Resources, Xinjiang University, Urumqi, 830046, P.R. China

\*Corresponding author. E-mail address: [licx@mail.buct.edu.cn](mailto:licx@mail.buct.edu.cn), [lyz0321@163.com](mailto:lyz0321@163.com)

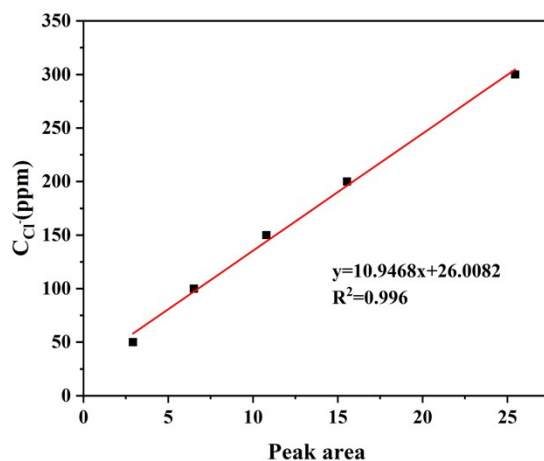

**Figure S1.** The standard curve and equation between  $C_{Cl^-}$  and its peak area.

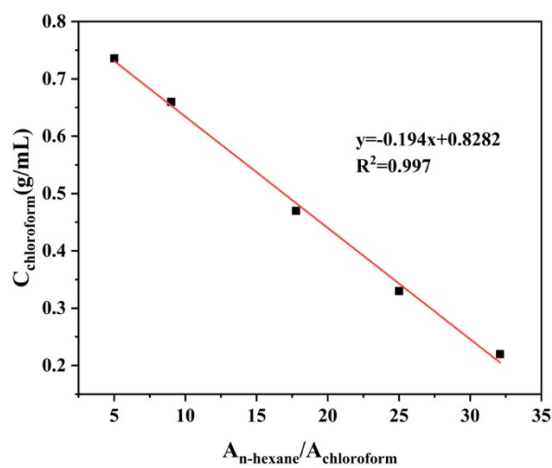

**Figure S2.** The standard curve and equation between  $C_{CF}$  and peak area ratio  $A_{n-hexane}/A_{chloroform}$ .

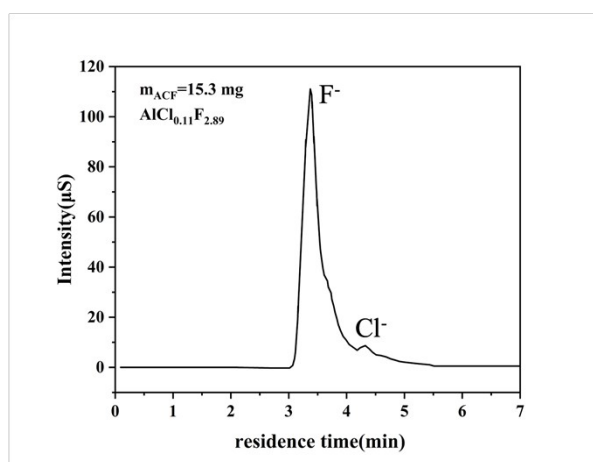

**Figure S3.** Ion chromatogram for the hydrolyzed solution of ACF produced under BPR=56:1, 450 rpm, 2 h.

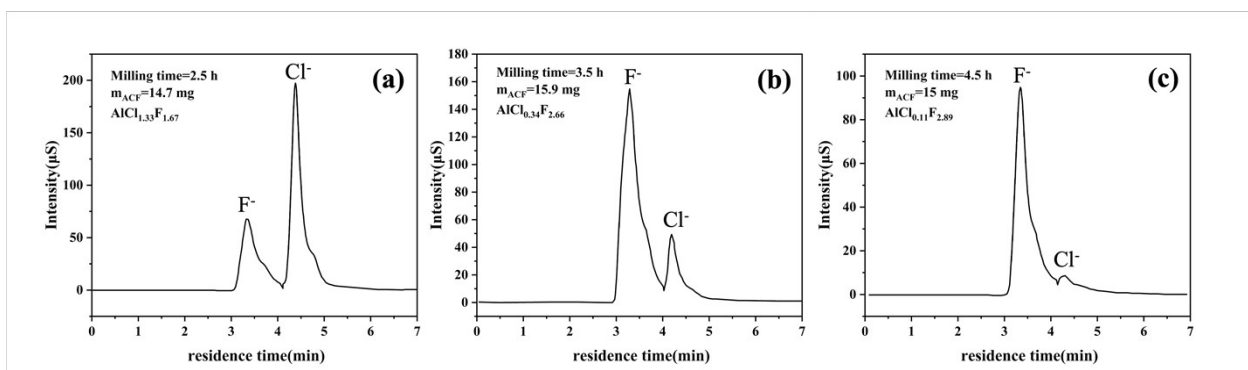

**Figure S4.** Ion chromatograms for the hydrolyzed solution of ACFs produced under BPR=28:1, 450 rpm.

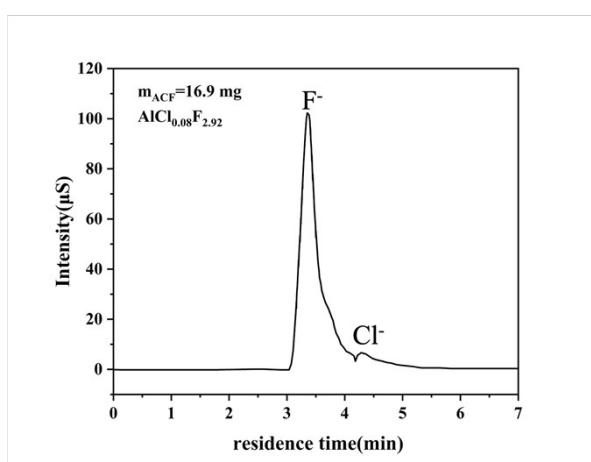

**Figure S5.** Ion chromatogram for the hydrolyzed solution for ACF produced under BPR=19:1, 450 rpm, 6.5 h.

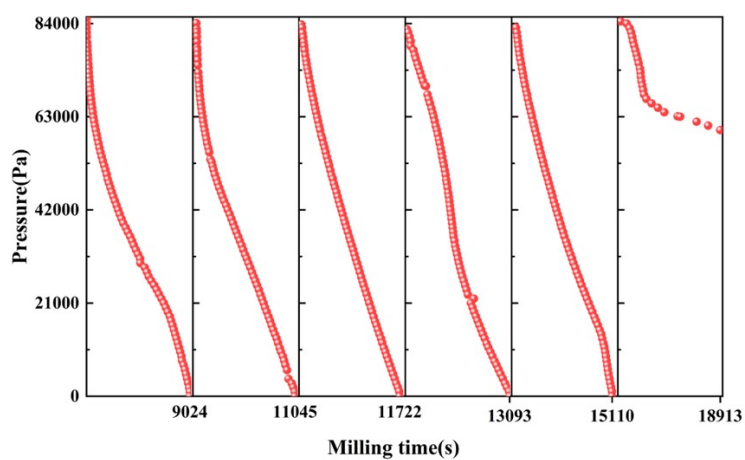

**Figure S6.** The consecutive pressure dropping of  $\text{CHF}_3$  in the milling tank under BPR=56:1 and 350 rpm.

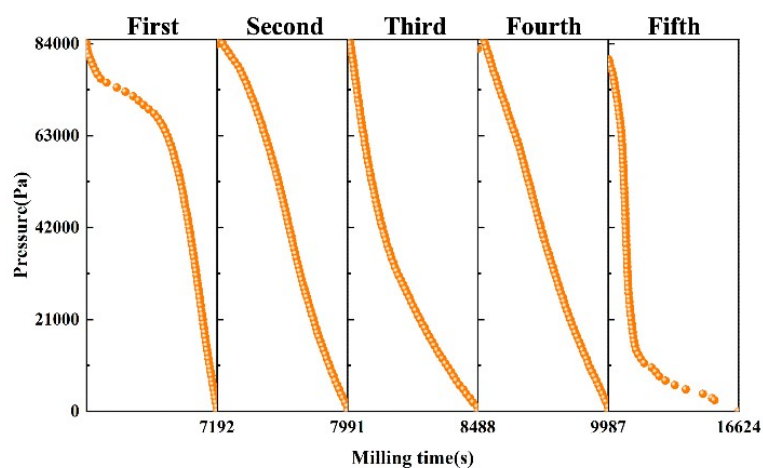

**Figure S7.** Pressure drop of  $\text{CHF}_3$  versus milling time in different rounds of gas charge under BPR=56:1 and 450 rpm.

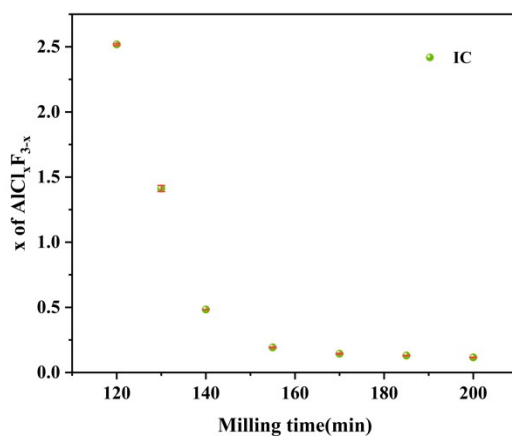

**Figure S8.** The x value of ACFs versus milling time.

**Table S1.** Experimental chemicals

| Reagents                   | Chemical formula          | Specification | Manufacture                               |
|----------------------------|---------------------------|---------------|-------------------------------------------|
| Fluoroform                 | $\text{CHF}_3$            | 99.99%        | Sinochem LantianFluoro Materials Co Ltd   |
| Aluminum chloride          | $\text{AlCl}_3$           | 99%           | Shanghai Macklin Biochemical Co Ltd       |
| Heptane                    | $\text{C}_7\text{H}_{16}$ | AR            | Tianjin Fuchen Chem Reagents Factory      |
| Trichloromethane           | $\text{CHCl}_3$           | AR            | Beijing Tong Guang Fine Chemicals Company |
| Sodium carbonate anhydrous | $\text{Na}_2\text{CO}_3$  | 99.8%         | Tianjin Fuchen Chem Reagents Factory      |
| Sodium hydrogen carbonate  | $\text{NaHCO}_3$          | 99.5%         | Tianjin Fuchen Chem Reagents Factory      |
| Deionized water            | $\text{H}_2\text{O}$      | -             | Hangzhou Wahaha Group Co Ltd              |

**Table S2.** Consumption of CHF<sub>3</sub> and the average *x* values under different reaction conditions in a planetary ball mill

|                     | BPR    | Pressure drop of CHF <sub>3</sub> /MPa | Milling time/h | Rotation rate/rpm | <i>x</i> |
|---------------------|--------|----------------------------------------|----------------|-------------------|----------|
| Planetary ball mill | 56:1   | 0.4918                                 | 2.0            | 450               | 0.111    |
|                     |        |                                        |                |                   | 0.113    |
|                     |        |                                        |                |                   | 0.108    |
|                     | 28:1   | 1.1661                                 | 4.5            |                   | 0.112    |
|                     |        |                                        |                |                   | 0.122    |
|                     |        |                                        |                |                   | 0.108    |
|                     | 28:1   | 0.5927                                 | 2.5            |                   | 1.331    |
|                     |        |                                        |                |                   | 1.284    |
|                     |        |                                        |                |                   | 1.362    |
|                     | 28:1   | 0.9511                                 | 3.5            |                   | 0.276    |
|                     |        |                                        |                |                   | 0.314    |
|                     |        |                                        |                |                   | 0.339    |
| 19:1                | 1.6326 | 6.5                                    | 0.088          |                   |          |
|                     |        |                                        | 0.080          |                   |          |
|                     |        |                                        | 0.088          |                   |          |

**Table S3.** Raw data for the composition of ACFs in Table 1

| BPR  | Milling time/h | m <sub>ACF</sub> /mg | H <sub>2</sub> O/g | Peak area of Cl |
|------|----------------|----------------------|--------------------|-----------------|
| 56:1 | 2.0            | 15.3                 | 10.0178            | 4.0413          |
|      |                | 12.9                 | 9.9456             | 3.1573          |
|      |                | 16.6                 | 10.0327            | 4.3527          |
| 28:1 | 4.5            | 15.0                 | 9.8958             | 4.0640          |
|      |                | 15.0                 | 10.0860            | 4.4900          |
|      |                | 16.6                 | 10.0327            | 4.3527          |
|      | 2.5            | 14.7                 | 10.0236            | 57.304          |
|      |                | 16.1                 | 10.2085            | 61.121          |
|      |                | 14.3                 | 9.9901             | 56.8869         |
|      | 3.5            | 15.5                 | 10.3534            | 15.2484         |
|      |                | 16.7                 | 10.0600            | 14.4455         |
|      |                | 15.9                 | 10.0114            | 17.1270         |
| 19:1 | 6.5            | 18.4                 | 10.1109            | 3.7335          |
|      |                | 19.3                 | 10.0664            | 3.4333          |
|      |                | 16.9                 | 10.0127            | 3.2749          |

**Table S4.** Consumption of CHF<sub>3</sub> and experimental results under different conditions

| Gas charge times | BPR    | Pressure drop of CHF <sub>3</sub> /kPa | Milling time/s | Rotation rate/rpm | AlCl <sub>x</sub> F <sub>3-x</sub>     | CHCl <sub>3</sub> /mol |
|------------------|--------|----------------------------------------|----------------|-------------------|----------------------------------------|------------------------|
| 1                | 56:1   | 85.1                                   | 9024           | 350               | AlCl <sub>0.12</sub> F <sub>2.88</sub> | 0.14                   |
| 2                |        | 84.1                                   | 2021           |                   |                                        |                        |
| 3                |        | 83.8                                   | 677            |                   |                                        |                        |
| 4                |        | 82.7                                   | 1371           |                   |                                        |                        |
| 5                |        | 83.1                                   | 2017           |                   |                                        |                        |
| 6                |        | 24.5                                   | 3803           |                   |                                        |                        |
| 1                | 56:1   | 86.1                                   | 7523           | 450               | AlCl <sub>0.11</sub> F <sub>2.89</sub> | 0.18                   |
| 2                |        | 81.3                                   | 1362           |                   |                                        |                        |
| 3                |        | 84.4                                   | 617            |                   |                                        |                        |
| 4                |        | 85.7                                   | 555            |                   |                                        |                        |
| 5                |        | 87.5                                   | 736            |                   |                                        |                        |
| 6                |        | 31.1                                   | 3278           |                   |                                        |                        |
| 1                | 56:1   | 85.0                                   | 5131           | 550               | AlCl <sub>0.11</sub> F <sub>2.89</sub> | 0.19                   |
| 2                |        | 85.8                                   | 2512           |                   |                                        |                        |
| 3                |        | 82.2                                   | 669            |                   |                                        |                        |
| 4                |        | 88.3                                   | 451            |                   |                                        |                        |
| 5                |        | 84.6                                   | 477            |                   |                                        |                        |
| 6                |        | 43.6                                   | 5097           |                   |                                        |                        |
| 1                | 112:1  | 87.5                                   | 4628           | 450               | AlCl <sub>0.10</sub> F <sub>2.90</sub> | 0.11                   |
| 2                |        | 83.2                                   | 1940           |                   |                                        |                        |
| 3                |        | 84.0                                   | 4546           |                   |                                        |                        |
| 1                | 37.5:1 | 83.7                                   | 9154           | 450               | AlCl <sub>0.10</sub> F <sub>2.90</sub> | 0.25                   |
| 2                |        | 84.8                                   | 2780           |                   |                                        |                        |
| 3                |        | 87.4                                   | 1699           |                   |                                        |                        |
| 4                |        | 84.9                                   | 564            |                   |                                        |                        |
| 5                |        | 83.4                                   | 230            |                   |                                        |                        |
| 6                |        | 85.4                                   | 282            |                   |                                        |                        |
| 7                |        | 82.3                                   | 428            |                   |                                        |                        |
| 8                |        | 41.6                                   | 3563           |                   |                                        |                        |

Conditions: 1.5 kg S.S balls, tank volume 1 L, room temperature, reacted in a stirring ball mill.

**Table S5.** Cl-content of ACFs ( $\text{AlCl}_x\text{F}_{3-x}$ ) after different times of gas charge as determined by different analysis methods.

| Gas charge times | Pressure drop of $\text{CHF}_3$ /kPa | $x_{\text{IC}}$ | $X_{\text{XPS}}$ | Theoretical $x$ |
|------------------|--------------------------------------|-----------------|------------------|-----------------|
| First            | 84.1                                 | -               | -                | -               |
| Second           | 84.8                                 | 1.656           | 1.47             | 2.32            |
|                  |                                      | 1.737           |                  |                 |
|                  |                                      | 1.706           |                  |                 |
| Third            | 84.6                                 | 0.800           | 0.92             | 1.47            |
|                  |                                      | 0.799           |                  |                 |
|                  |                                      | 0.789           |                  |                 |
| Fourth           | 87.5                                 | 0.237           | 0.19             | 0.73            |
|                  |                                      | 0.249           |                  |                 |
|                  |                                      | 0.217           |                  |                 |
| Fifth            | 80.5                                 | 0.105           | 0.095            | 0.45            |
|                  |                                      | 0.110           |                  |                 |
|                  |                                      | 0.109           |                  |                 |

Conditions: 0.2 mol  $\text{AlCl}_3$ , 450 rpm, BPR=56:1, tank volume 1 L, room temperature, reacted in a stirring ball mill.

**Table S6.** Specie information of ACFs determined from XPS spectrum.

| Gas charge times | Al 2p              |                               | Cl 2p              |                               | F 1s               |                               |
|------------------|--------------------|-------------------------------|--------------------|-------------------------------|--------------------|-------------------------------|
|                  | Peak position (eV) | Species                       | Peak position (eV) | Species                       | Peak position (eV) | Species                       |
| Second           | 76.01              | $\text{AlCl}_x\text{F}_{3-x}$ | 199.57             | $\text{AlCl}_x\text{F}_{3-x}$ | 686.44             | $\text{AlCl}_x\text{F}_{3-x}$ |
| Third            | 76.10              | $\text{AlCl}_x\text{F}_{3-x}$ | 199.64             | $\text{AlCl}_x\text{F}_{3-x}$ | 686.55             | $\text{AlCl}_x\text{F}_{3-x}$ |
| Fourth           | 76.81              | $\text{AlCl}_x\text{F}_{3-x}$ | 200.32             | $\text{AlCl}_x\text{F}_{3-x}$ | 687.42             | $\text{AlCl}_x\text{F}_{3-x}$ |
| Fifth            | 76.30              | $\text{AlCl}_x\text{F}_{3-x}$ | 200.50             | $\text{AlCl}_x\text{F}_{3-x}$ | 687.10             | $\text{AlCl}_x\text{F}_{3-x}$ |
|                  | 77.30              | $\text{AlF}_3$                |                    |                               | 688.2              | $\text{AlF}_3$                |

**Table S7.** Detailed Cl-content of ACFs in different milling time

|   | Milling time/min | $x_{IC}$ of $AlCl_xF_{3-x}$ |
|---|------------------|-----------------------------|
| 1 | 120              | 2.51                        |
| 2 |                  | 2.52                        |
| 3 |                  | 2.52                        |
| 1 | 130              | 1.40                        |
| 2 |                  | 1.40                        |
| 3 |                  | 1.44                        |
| 1 | 140              | 0.48                        |
| 2 |                  | 0.48                        |
| 3 |                  | 0.48                        |
| 1 | 155              | 0.19                        |
| 2 |                  | 0.19                        |
| 3 |                  | 0.19                        |
| 1 | 170              | 0.15                        |
| 2 |                  | 0.15                        |
| 3 |                  | 0.140                       |
| 1 | 185              | 0.13                        |
| 2 |                  | 0.13                        |
| 3 |                  | 0.13                        |
| 1 | 200              | 0.12                        |
| 2 |                  | 0.12                        |
| 3 |                  | 0.11                        |

Conditions: 0.2 mol  $AlCl_3$ , 450 rpm, BPR=56:1, tank volume 1 L,  $P_{CHF_3}$ =80 kPa, room temperature, reacted in a stirring ball mill.

### Text S1 Ion chromatography

This method is based on the facile hydrolysis of the Al-Cl bond to water. ACFs ( $AlCl_xF_{3-x}$ ,  $0 \leq x \leq 3$ ) will be fully hydrolyzed to  $Al(OH)_x F_{3-x}$  when it is soaked by water. About 20 mg of ACFs and some water were weighed accurately, added to a glass vial, and sonicated for 30 minutes in a ultrasound bath for its complete hydrolysis. The suspension is filtrated, and the filtrate was diluted by pure water to a constant volume. The  $Cl^-$  concentration of the above solution was determined three times by ion chromatography with the standard curve (Figure S1), and the average value was taken



as the reported value. The  $x$  value of ACFs is calculated by equation (1).

$$\frac{C_{Cl^-} \times V}{M_{ACF}} = \frac{35.5x}{27 + 35.5x + 19(3 - x)} \quad (1)$$

where  $C_{Cl^-}$ ,  $V$  and  $M_{ACF}$  denote the concentration of chloride ions (ppm), the solution volume (L) and the mass of ACF (mg) respectively.

## Text S2 Characterization

X-ray diffraction (XRD) pattern was recorded on Ultima IV, Japan, and each XRD pattern was acquired from  $5^\circ$  to  $90^\circ$  at a rate of  $10^\circ/s$ . X-ray photoelectron spectroscopy (XPS, Thermo Scientific K-Alpha, USA) measurements were performed on the surface elemental composition of ACF.  $NH_3$ -Temperature programmed desorption ( $NH_3$ -TPD): the acidity of ACF was characterized using ammonia thermal programmed temperature desorption on a chemical adsorption analyzer (Quantachrome Autosorb-iQ). A sample of 50-100 mg was treated under He flow rate of 20 mL/min, heated from room temperature to  $300^\circ C$  at  $10^\circ C/min$  and dried, then cooled to  $120^\circ C$ , and finally saturated with 5%  $NH_3$  in He for 60 min. Residual ammonia was flushed at  $60^\circ C$ . In the end, the sample was heated in He flow to  $700^\circ C$  at  $10^\circ C/min$ , and the desorbing ammonia from the sample was detected by a thermal conductivity detector (TCD).

The gas composition was determined with gas chromatograph (GC, SHIMADZU GC2010) equipped with a hydrogen flame ionization detector (FID) and packed columns of Agilent PoraplotQ ( $25\text{ m} \times 0.32\text{ mm} \times 10\text{ }\mu\text{m}$ ).  $N_2$  was used as the carrier gas at a flow rate of  $30\text{ mL min}^{-1}$ . The temperature of injection and detector were  $250^\circ C$ , while the temperature program of the column was  $100^\circ C$  for 3 min and  $10^\circ C\text{ min}^{-1}$  to  $150^\circ C$  for 8 min.

Qualitative analysis of the liquid product was performed on an Agilent 7890B GC-MS equipped with an HP-5MS capillary column ( $30\text{ m} \times 0.25\text{ mm} \times 0.25\text{ }\mu\text{m}$ ) and a quadrupole analyzer system (5977A) with a high efficiency ion source operated at  $230^\circ C$ . Helium was used as the carrier gas at a flow rate of  $1.0\text{ mL min}^{-1}$ , the sample size was  $1.0\text{ }\mu\text{L}$ , and the split ratio was 10:1.

Quantitative analysis of the liquid product was performed on a SHIMADZU GC2010 gas chromatograph (GC) equipped with an FFAP capillary column (30 m × 0.53 mm × 1 μm) and an FID detector. n-Heptane was used as the internal standard. N<sub>2</sub> was the carrier gas at a flow rate of 30 mL min<sup>-1</sup>. The temperature of injection and detector were 200°C, while the temperature program of the column was 40°C for 3 min, 15 °C min<sup>-1</sup> to 60°C for 1 min, 15 °C min<sup>-1</sup> to 90°C for 1 min, and 20 °C min<sup>-1</sup> to 150°C for 0.5 min.

### **Text S3 Cartesian coordinates and energy information of optimized structure**

(1) Pure component

#### **AlCl<sub>3</sub>**

|    |             |             |            |
|----|-------------|-------------|------------|
| Al | -1.10619470 | 0.48672566  | 0.00000000 |
| Cl | 1.13380530  | 0.48672566  | 0.00000000 |
| Cl | -2.22619470 | -1.45317125 | 0.00000000 |
| Cl | -2.22619470 | 2.42662256  | 0.00000000 |

#### **AlCl<sub>2</sub>F**

|    |            |             |            |
|----|------------|-------------|------------|
| Al | 4.17369316 | 1.03709948  | 0.00000000 |
| F  | 6.00369316 | 1.03709948  | 0.00000000 |
| Cl | 3.05369315 | -0.90279742 | 0.00000000 |
| Cl | 3.05369315 | 2.97699638  | 0.00000000 |

#### **AlClF<sub>2</sub>**

|    |            |             |             |
|----|------------|-------------|-------------|
| Al | 0.00000000 | 0.00000000  | 0.36261100  |
| F  | 0.00000000 | 0.00000000  | 2.00504600  |
| Cl | 0.00000000 | -1.83774600 | -0.66939300 |
| F  | 0.00000000 | 1.59562397  | -0.53342704 |

#### **AlF<sub>3</sub>**

|    |             |             |            |
|----|-------------|-------------|------------|
| Al | 0.00000000  | 0.43377600  | 0.00000000 |
| F  | -1.41406800 | 1.26266900  | 0.00000000 |
| F  | 1.41316900  | 1.26435400  | 0.00000000 |
| F  | 0.00041414  | -1.39622395 | 0.00000000 |

#### **CHF<sub>3</sub>**

|   |             |             |             |
|---|-------------|-------------|-------------|
| C | -3.05309736 | -0.15042958 | -0.00196923 |
| H | -4.12309736 | -0.15041640 | -0.00196923 |
| F | -2.60308957 | 0.48596066  | -1.10423982 |
| F | -2.60308957 | 0.48596066  | 1.10030136  |

|                                     |             |             |             |
|-------------------------------------|-------------|-------------|-------------|
| F                                   | -2.60311281 | -1.42322725 | -0.00196923 |
| <b>CHF<sub>2</sub>Cl</b>            |             |             |             |
| Cl                                  | 0.96247400  | -0.69914100 | -0.94771200 |
| C                                   | 2.23934800  | -0.13314800 | 0.30022300  |
| H                                   | 1.82859300  | -0.39783200 | 1.27330900  |
| F                                   | 3.36810000  | -0.75925400 | 0.00602400  |
| F                                   | 2.38248700  | 1.17508500  | 0.15092700  |
| <b>CHFC<sub>l</sub><sub>2</sub></b> |             |             |             |
| Cl                                  | 1.29170200  | -0.00008900 | -0.05015600 |
| C                                   | -0.45610900 | 0.00003400  | 0.36636200  |
| H                                   | -0.55011500 | 0.00027900  | 1.45356800  |
| F                                   | -1.03750900 | -1.09041500 | -0.15548500 |
| Cl                                  | -1.21854090 | 1.43089856  | -0.31841841 |
| <b>CHCl<sub>3</sub></b>             |             |             |             |
| Cl                                  | -1.48073000 | -0.50392800 | -0.06376600 |
| C                                   | -0.00005100 | 0.38539300  | 0.40282600  |
| H                                   | -0.00014600 | 0.49545800  | 1.48577300  |
| Cl                                  | 1.48099800  | -0.50356900 | -0.06377300 |
| Cl                                  | -0.00058237 | 1.96337884  | -0.37663561 |

(2) Cartesian coordinates for the reaction

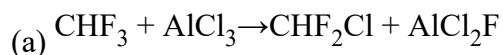

**Reactant**

**Thermal Correction to Free Energy = -5.52397053 Hartree**

**Electronic Energy (EE) = -1231004.124 Hartree**

|    |             |             |             |
|----|-------------|-------------|-------------|
| Al | -0.83996800 | 0.03592800  | 0.21026100  |
| Cl | 0.47651000  | 0.16698400  | 1.89721000  |
| Cl | -1.92038100 | 1.78182900  | -0.40789100 |
| Cl | -1.82949900 | -1.83397300 | -0.13928000 |
| C  | 2.16307800  | -0.05979400 | -1.06763700 |
| H  | 2.52664900  | -0.00868200 | -2.09276200 |
| F  | 2.56970300  | 0.94624000  | -0.32736700 |
| F  | 0.73258300  | 0.04229400  | -1.18331900 |
| F  | 2.41536600  | -1.21270800 | -0.48746700 |

**TS**

**Thermal Correction to Free Energy = -6.73820238 Hartree**

**Electronic Energy (EE) = -1230972.20 Hartree**

|    |            |            |            |
|----|------------|------------|------------|
| Al | 0.80069222 | 0.15900823 | 0.08876088 |
|----|------------|------------|------------|

|    |             |             |             |
|----|-------------|-------------|-------------|
| Cl | 1.41287351  | 2.20688006  | -0.37992918 |
| Cl | 0.55253436  | -0.28240033 | 2.27077283  |
| Cl | 2.12676711  | -1.44291532 | -0.74368512 |
| C  | -0.56948348 | 2.83525001  | -1.59344595 |
| H  | -1.49746624 | 2.96664777  | -2.10966550 |
| F  | -0.89128444 | 3.85022585  | -0.76352535 |
| F  | -0.49775281 | 1.44940037  | -0.81231724 |
| F  | 0.11628188  | 3.07401242  | -2.73152257 |

**Product**

**Thermal Correction to Free Energy = -6.02472351 Hartree**

**Electronic Energy (EE) = -1231005.694 Hartree**

|    |             |             |             |
|----|-------------|-------------|-------------|
| Al | -1.08847200 | -0.03436400 | -0.40398700 |
| Cl | 0.91280900  | 0.16879300  | 1.22930100  |
| Cl | -2.09263400 | 1.83527200  | -0.15591500 |
| Cl | -2.01212000 | -1.87652200 | 0.14396100  |
| C  | 2.25969400  | 0.12913800  | -0.10232700 |
| H  | 1.77197600  | 0.46978100  | -1.01057100 |
| F  | 3.23463600  | 0.92043900  | 0.30931100  |
| F  | -0.01012400 | -0.09058600 | -1.66910600 |
| F  | 2.67520100  | -1.12229400 | -0.18889500 |

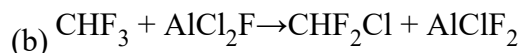

**Reactant**

**Thermal Correction to Free Energy = -4.24698768 Hartree**

**Electronic Energy (EE) = -1004883.071 Hartree**

|    |             |             |             |
|----|-------------|-------------|-------------|
| Al | 0.93564900  | -0.27392800 | -0.28239900 |
| Cl | -0.25468000 | 0.76743300  | -1.72621600 |
| Cl | 2.50235400  | 0.81907600  | 0.68551700  |
| C  | -1.99884600 | -0.24477800 | 1.04748100  |
| H  | -2.36549900 | -0.50561200 | 2.03918600  |
| F  | -2.27998600 | 0.99131400  | 0.70346700  |
| F  | -0.56952500 | -0.34307700 | 1.14688500  |
| F  | -2.37567300 | -1.09686300 | 0.11843400  |
| F  | 1.14727800  | -1.90107100 | -0.42198800 |

**TS**

**Thermal Correction to Free Energy = -5.33320749 Hartree**

**Electronic Energy (EE) = -1004850.798 Hartree**

|    |            |            |             |
|----|------------|------------|-------------|
| Al | 0.80069222 | 0.15900823 | 0.08876088  |
| Cl | 1.41287351 | 2.20688006 | -0.37992918 |

|    |             |             |             |
|----|-------------|-------------|-------------|
| Cl | 0.55253436  | -0.28240033 | 2.27077283  |
| C  | -0.56948348 | 2.83525001  | -1.59344595 |
| H  | -1.49746624 | 2.96664777  | -2.10966550 |
| F  | -0.89128444 | 3.85022585  | -0.76352535 |
| F  | -0.49775281 | 1.44940037  | -0.81231724 |
| F  | 0.11628188  | 3.07401242  | -2.73152257 |
| F  | 1.88404804  | -1.14970610 | -0.59131777 |

### Product

**Thermal Correction to Free Energy = -4.58521557 Hartree**

**Electronic Energy (EE) = -1004884.279 Hartree**

|    |             |             |             |
|----|-------------|-------------|-------------|
| Al | 1.18780800  | -0.58267600 | 0.19635800  |
| Cl | -0.71029500 | 0.63498500  | -1.06548300 |
| Cl | 2.67877800  | 0.91990100  | 0.44522300  |
| C  | -2.04938000 | 0.29789000  | 0.21390900  |
| H  | -1.53383200 | 0.27462400  | 1.16965700  |
| F  | -2.93700500 | 1.27380500  | 0.11024500  |
| F  | 0.16511100  | -0.80985100 | 1.48503200  |
| F  | -2.59851400 | -0.86583600 | -0.09266600 |
| F  | 1.43607200  | -1.83528200 | -0.83697500 |

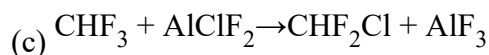

### Reactant

**Thermal Correction to Free Energy = -2.50564743 Hartree**

**Electronic Energy (EE) = -778764.9288 Hartree**

|    |             |             |             |
|----|-------------|-------------|-------------|
| Al | 1.13646900  | -0.05217300 | 0.24051300  |
| Cl | 1.03709300  | -2.13424100 | -0.22448500 |
| C  | -1.69521600 | 0.89548600  | 0.04207600  |
| H  | -1.38715800 | 1.35166400  | 0.97575900  |
| F  | -2.42390600 | 1.67525000  | -0.72658000 |
| F  | -0.48883800 | 0.64388200  | -0.71158400 |
| F  | -2.26565800 | -0.28009600 | 0.19900200  |
| F  | 0.50693600  | 0.44064300  | 1.69091600  |
| F  | 2.29289500  | 0.88542500  | -0.45847700 |

### TS

**Thermal Correction to Free Energy = -3.16139538 Hartree**

**Electronic Energy (EE) = -778733.2182 Hartree**

|    |            |            |             |
|----|------------|------------|-------------|
| Al | 0.80069222 | 0.15900823 | 0.08876088  |
| Cl | 1.41287351 | 2.20688006 | -0.37992918 |

|   |             |             |             |
|---|-------------|-------------|-------------|
| C | -0.56948348 | 2.83525001  | -1.59344595 |
| H | -1.49746624 | 2.96664777  | -2.10966550 |
| F | -0.89128444 | 3.85022585  | -0.76352535 |
| F | -0.49775281 | 1.44940037  | -0.81231724 |
| F | 0.11628188  | 3.07401242  | -2.73152257 |
| F | 1.88404804  | -1.14970610 | -0.59131777 |
| F | 0.59795611  | -0.20160680 | 1.87138672  |

**Product**

**Thermal Correction to Free Energy = -3.3571785 Hartree**

**Electronic Energy (EE) = -778762.9064 Hartree**

|    |             |             |             |
|----|-------------|-------------|-------------|
| Al | 1.35439900  | 0.70957000  | 0.04011300  |
| Cl | -0.19063100 | -1.30346300 | -0.34072500 |
| C  | -1.70071100 | -0.45064300 | 0.36572900  |
| H  | -1.36133800 | -0.01019200 | 1.29693300  |
| F  | -2.09029200 | 0.45562500  | -0.52134400 |
| F  | 0.90592500  | 1.67264600  | -1.21952500 |
| F  | -2.63633100 | -1.37356900 | 0.52311200  |
| F  | 0.59393400  | 0.97909700  | 1.48799000  |
| F  | 2.80056500  | -0.05716800 | 0.00013800  |

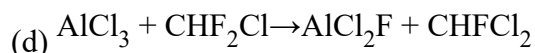

**Reactant**

**Thermal Correction to Free Energy = -7.59349851 Hartree**

**Electronic Energy (EE) = -1457123.71 Hartree**

|    |             |             |             |
|----|-------------|-------------|-------------|
| Al | 1.03281500  | 0.01122000  | 0.23693700  |
| Cl | 0.14166800  | -1.34673500 | 1.63957500  |
| Cl | 2.87080700  | -0.60105800 | -0.67946800 |
| Cl | 0.77527900  | 2.13326000  | 0.42662700  |
| C  | -1.87561300 | -0.36098900 | -1.12658200 |
| H  | -2.19979600 | -0.25605100 | -2.16007100 |
| F  | -2.15935800 | -1.54927800 | -0.62803900 |
| F  | -0.43344700 | -0.28698400 | -1.21849000 |
| Cl | -2.46896300 | 0.93476600  | -0.11748600 |

**TS**

**Thermal Correction to Free Energy = -7.89093825 Hartree**

**Electronic Energy (EE) = -1457099.914 Hartree**

|    |            |             |             |
|----|------------|-------------|-------------|
| Al | 0.80069222 | 0.15900823  | 0.08876088  |
| Cl | 1.41287351 | 2.20688006  | -0.37992918 |
| Cl | 0.55253436 | -0.28240033 | 2.27077283  |

|    |             |             |             |
|----|-------------|-------------|-------------|
| Cl | 2.12676711  | -1.44291532 | -0.74368512 |
| C  | -0.59669474 | 2.87018657  | -1.54845857 |
| H  | -1.52114960 | 3.02141031  | -2.06558001 |
| F  | -0.80006947 | 4.01218976  | -0.85783028 |
| F  | -0.47753915 | 1.38354498  | -0.77287699 |
| Cl | 0.28423100  | 2.89486244  | -3.07192860 |

**Product**

**Thermal Correction to Free Energy = -7.68950754 Hartree**

**Electronic Energy (EE) = -1457127.306 Hartree**

|    |             |             |             |
|----|-------------|-------------|-------------|
| Al | 1.27958100  | 0.33324100  | -0.46797600 |
| Cl | -0.41778900 | -1.05165200 | 0.93530300  |
| Cl | 3.03847200  | -0.81475200 | -0.10643200 |
| Cl | 1.07237500  | 2.26926400  | 0.40624000  |
| C  | -1.89684000 | -0.83050000 | -0.17842900 |
| H  | -1.47439200 | -0.78661400 | -1.18146800 |
| F  | -2.67954900 | -1.89129900 | 0.00856900  |
| F  | 0.38273600  | 0.02240800  | -1.83194500 |
| Cl | -2.73910200 | 0.66304200  | 0.21188500  |

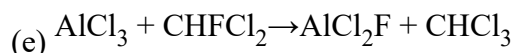

**Reactant**

**Thermal Correction to Free Energy = -8.90624943 Hartree**

**Electronic Energy (EE) = -1683246.101 Hartree**

|    |             |             |             |
|----|-------------|-------------|-------------|
| Al | 1.22897200  | -0.01888900 | 0.31336300  |
| Cl | 0.30894700  | -1.18768200 | 1.85750800  |
| Cl | 2.66875800  | -0.96276100 | -0.97196400 |
| Cl | 1.42028900  | 2.09090000  | 0.65142600  |
| C  | -1.70949300 | 0.11658200  | -1.11425700 |
| H  | -1.91364900 | 0.34472800  | -2.15636700 |
| F  | -0.26865000 | -0.02854500 | -1.08759800 |
| Cl | -2.14687400 | 1.45687200  | -0.08285100 |
| Cl | -2.41163600 | -1.41718900 | -0.66050000 |

**TS**

**Thermal Correction to Free Energy = -9.70381464 Hartree**

**Electronic Energy (EE) = -1683228.977 Hartree**

|    |            |             |             |
|----|------------|-------------|-------------|
| Al | 1.08706800 | -0.01851200 | -0.09261300 |
| Cl | 0.03142300 | -1.28833600 | 1.36360900  |
| Cl | 3.13106700 | -0.52894300 | -0.44789400 |
| Cl | 0.69705300 | 2.05816400  | 0.45998800  |

|    |             |             |             |
|----|-------------|-------------|-------------|
| C  | -2.21414100 | -0.48752100 | -0.77001000 |
| H  | -1.75825200 | -0.56220400 | -1.75264800 |
| F  | 0.08274600  | -0.29498700 | -1.46949900 |
| Cl | -2.44111100 | 0.95266900  | -0.03325400 |
| Cl | -2.83247844 | -1.95197366 | -0.01460467 |

**Product**

**Thermal Correction to Free Energy = -9.36558675 Hartree**

**Electronic Energy (EE) = -1683251.224 Hartree**

|    |             |             |             |
|----|-------------|-------------|-------------|
| Al | 1.54056300  | 0.28002000  | -0.46864400 |
| Cl | -0.32232600 | -0.93684700 | 0.87484700  |
| Cl | 3.14186900  | -1.09267500 | -0.15227500 |
| Cl | 1.59050500  | 2.18779100  | 0.49075200  |
| C  | -1.75841700 | -0.39837700 | -0.17358100 |
| H  | -1.35943000 | -0.42405100 | -1.18607600 |
| F  | 0.61677200  | 0.13947100  | -1.83961100 |
| Cl | -2.21867300 | 1.25478200  | 0.22826400  |
| Cl | -3.07254000 | -1.55595500 | 0.01321300  |

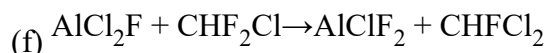

**Reactant**

**Thermal Correction to Free Energy = -6.05798154 Hartree**

**Electronic Energy (EE) = -1231002.625 Hartree**

|    |             |             |             |
|----|-------------|-------------|-------------|
| Al | -1.07203100 | 0.15823200  | 0.44138000  |
| Cl | -0.23538700 | -1.58427600 | 1.35889800  |
| Cl | -2.76656100 | -0.08506700 | -0.84186600 |
| C  | 1.69672000  | 0.21806700  | -1.17600200 |
| H  | 1.97993900  | 0.71039900  | -2.10377000 |
| F  | 0.28639700  | 0.45791200  | -1.06807300 |
| F  | 1.85045500  | -1.09195700 | -1.23505500 |
| Cl | 2.49095200  | 0.92149100  | 0.21320400  |
| F  | -0.85053800 | 1.61041300  | 1.18659200  |

**TS**

**Thermal Correction to Free Energy = -6.85366422 Hartree**

**Electronic Energy (EE) = -1230977.797 Hartree**

|    |             |             |             |
|----|-------------|-------------|-------------|
| Al | -0.90675200 | 0.00275600  | -0.07102400 |
| Cl | 0.58885500  | 0.17400600  | 1.56919000  |
| Cl | -1.98051000 | -1.85085300 | 0.01350900  |
| C  | 2.45930600  | 0.05862100  | -0.70111100 |



|    |             |             |             |
|----|-------------|-------------|-------------|
| H  | 2.07544900  | 0.34533500  | -1.67128600 |
| F  | 0.29190400  | -0.06836700 | -1.33088200 |
| F  | 2.62914200  | -1.15094800 | -0.40147400 |
| Cl | 3.26741784  | 1.24246836  | 0.32019242  |
| F  | -1.89073482 | 1.53517673  | -0.25092543 |

**Product**

**Thermal Correction to Free Energy = -6.53739918 Hartree**

**Electronic Energy (EE) = -1231005.723 Hartree**

|    |             |             |             |
|----|-------------|-------------|-------------|
| Al | -1.30778400 | 0.68368000  | -0.19760800 |
| Cl | 0.30103100  | -1.17276600 | 0.61856800  |
| Cl | -3.14418600 | -0.38492000 | -0.15215800 |
| C  | 1.78714600  | -0.60428300 | -0.35346500 |
| H  | 1.37458000  | -0.26654400 | -1.30164300 |
| F  | -0.45242600 | 0.77332600  | -1.61714300 |
| F  | 2.59059400  | -1.65802900 | -0.47981600 |
| Cl | 2.59300300  | 0.71750100  | 0.48395700  |
| F  | -1.02215400 | 1.85602700  | 0.92064600  |

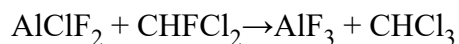

**Reactant**

**Thermal Correction to Free Energy = -6.13328274 Hartree**

**Electronic Energy (EE) = -1231003.952 Hartree**

|    |             |             |             |
|----|-------------|-------------|-------------|
| Al | 1.58654854  | 0.07082412  | -0.04559208 |
| Cl | 0.69502098  | -1.42809545 | -1.28515480 |
| C  | -1.42485289 | 0.40230707  | 0.87901271  |
| H  | -1.79199764 | 0.85748824  | 1.79368891  |
| F  | -0.03810077 | 0.09950473  | 1.21040842  |
| Cl | -1.47329808 | 1.53525401  | -0.44525581 |
| F  | 1.45459751  | 1.66505182  | -0.43571649 |
| F  | 2.92761308  | -0.34699189 | 0.81313335  |
| Cl | -2.26541497 | -1.09473148 | 0.54959185  |

**TS**

**Thermal Correction to Free Energy = -7.43473848 Hartree**

**Electronic Energy (EE) = -1230985.209 Hartree**

|    |             |             |             |
|----|-------------|-------------|-------------|
| Al | -1.09921500 | 0.24174600  | 0.03819600  |
| Cl | -0.10317500 | -1.51869100 | 0.92310800  |
| C  | 2.09333100  | -0.06666500 | -0.81073800 |
| H  | 1.63202300  | 0.25155200  | -1.74088000 |
| F  | -0.17130500 | 0.34020100  | -1.42016500 |

|    |             |             |             |
|----|-------------|-------------|-------------|
| Cl | 2.36996000  | 0.98066800  | 0.41817200  |
| F  | -0.61656300 | 1.58380500  | 0.91509500  |
| F  | -2.89054908 | 0.03981561  | -0.27683786 |
| Cl | 2.71671624  | -1.70849153 | -0.69499480 |

**Product**

**Thermal Correction to Free Energy = -7.09462806 Hartree**

**Electronic Energy (EE) = -1231008.039 Hartree**

|    |             |             |             |
|----|-------------|-------------|-------------|
| Al | 1.80324788  | 0.20798941  | 0.33774269  |
| Cl | 0.28583068  | -1.14722782 | -0.95219865 |
| C  | -1.33510186 | -0.05717578 | 0.14996200  |
| H  | -0.69495444 | -0.00448202 | 1.03089316  |
| F  | 0.91150563  | 0.03133477  | 1.74944939  |
| Cl | -1.64139710 | 1.44191549  | -0.60825368 |
| F  | 1.47871562  | 1.62459595  | -0.44564743 |
| F  | 3.33007808  | -0.39806305 | 0.37891759  |
| Cl | -2.66542183 | -1.11881324 | 0.30446870  |
